# Supplementary material for: Synergistic action of spatially self-reconfiguring bilayer lithiophilic alloys and inorganic passivation layers for enhancing Li metal anode performance
Source: Royal Society of Chemistry journal article supplement (doi:10.1039/d4ta08031a), 2025-01-01
Supplement: d4ta08031a1.pdf [file d4ta08031a1.pdf]

## Supporting Information

### Synergistic action of spatially self-reconfiguring bilayer lithiophilic alloys and inorganic passivation layers for enhancing Li metal anode performance

Yiwei Bu,<sup>a</sup> Shidi Huang<sup>b,\*</sup>, Jinqi Zhu,<sup>a</sup> Zhe Cui,<sup>a</sup> Mengluan Gao,<sup>a</sup> Wenqing Wang,<sup>a</sup>  
Rujia Zou<sup>a,\*</sup>

<sup>a</sup> State Key Laboratory for Modification of Chemical Fibers and Polymer Materials,  
College of Materials Science and Engineering, Donghua University, Shanghai 201620,  
China

E-mail: [rjzou@dhu.edu.cn](mailto:rjzou@dhu.edu.cn)

<sup>b</sup> School of Ecological Technology and Engineering, Shanghai Institute of  
Technology, Shanghai 201418, P. R. China

E-mail: [sdhuang@sit.edu.cn](mailto:sdhuang@sit.edu.cn)



**Figure S1** SEM image of Mg-Zn alloy particles synthesized by atomization method.



**Figure S2** XRD pattern of Mg-Zn alloy particles synthesized by atomization method.



**Figure S3** (a) Galvanostatic discharge/charge voltage profiles and (b) average hysteresis of LMZG electrodes composed of alloys with Mg/Zn weight ratios of 2:98, 10:90, and 20:80, respectively, at  $4 \text{ mA cm}^{-2}$  for  $1 \text{ mAh cm}^{-2}$ .



**Figure S4** The digital photographs of (a) bare Li electrode, (b) LMZ electrode, and (c) LMZG electrode.



**Figure S5** Cross-sectional SEM and EDS images of LMZG electrode before cycle.



**Figure S6** Voltage profiles of (a) bare Li and (b) LMZG electrode upon discharging at  $0.5 \text{ mA cm}^{-2}$  for  $0.5 \text{ mAh cm}^{-2}$ . Voltage profiles of (c) bare Li and (d) LMZG electrode upon discharging at  $1 \text{ mA cm}^{-2}$  for  $1 \text{ mAh cm}^{-2}$ .



**Figure S7** (a) Top-view and (c) cross-sectional SEM images of LMZG electrode after 50 cycles at  $1 \text{ mA cm}^{-2}$  for  $1 \text{ mAh cm}^{-2}$ ; (b) Top-view and (d) cross-sectional SEM images of bare Li electrode after 50 cycles at  $1 \text{ mA cm}^{-2}$  for  $1 \text{ mAh cm}^{-2}$ .



**Figure S8** Side-view SEM images of 3, 6, and 12 mA h cm<sup>-2</sup> deposited at a current of 1 mA cm<sup>-2</sup> after 10 cycles of depositing 1 mA h cm<sup>-2</sup> at a current of 1 mA cm<sup>-2</sup>: (a) LMZG electrode and (b) Bare Li electrode.



**Figure S9** Galvanostatic discharge/charge voltage profiles of LMZG and bare Li in symmetric cells at 0.5 mA cm<sup>-2</sup> for 0.5 mA h cm<sup>-2</sup>.



**Figure S10** Galvanostatic discharge/charge voltage profiles of LMZG and bare Li in symmetric cells at  $2 \text{ mA cm}^{-2}$  for  $2 \text{ mAh cm}^{-2}$ .



**Figure S11** The equivalent circuit for the fitting of EIS spectra of LMZG and bare Li.  $R_s$ ,  $R_{SEI}$ ,  $R_{ct}$ ,  $Q$ , and  $W_d$  refer to the internal resistance, surface layer resistance, charge transfer resistance, constant phase elements, and Warburg impedance of symmetric cells, respectively.



**Figure S12** Electrochemical impedance spectra of LMZG electrode in symmetric cells after cycling at  $1 \text{ mA cm}^{-2}$ .



**Figure S13** Electrochemical impedance spectra of bare Li electrode in symmetric cells after cycling at  $1 \text{ mA cm}^{-2}$ .



Figure S14 XPS depth profile of (a) LMZG and (b) bare Li electrode after 50 cycles at  $1 \text{ mA cm}^{-2}$  for  $1 \text{ mAh cm}^{-2}$ .



Figure S15 Charge/discharge profiles of bare Li//LFP full cells at various rates.



Figure S16 Voltage curves comparison of the LMZG and bare Li full-cells at 5 C.



Figure S17 Voltage curves comparison of the LMZG and bare Li full-cells at 10 C.



**Figure S18** SEM images of bare Li metal anode taken from bare Li//LFP full cells after 400 cycles at 1 C.



**Figure S19** Charge/discharge profiles of (a) LMZG//LFP and (b) bare Li//LFP full cells at 1 C.



**Figure S20** SEM images of LMZG electrode taken from LMZG//LFP full cells after 400 cycles at 1 C.

**Table S1** The corresponding fitting values are based on the equivalent circuit.

| Electrode | Cycle | $R_s(\Omega)$ | $R_{SEI}(\Omega)$ | $R_{ct}(\Omega)$ |
|-----------|-------|---------------|-------------------|------------------|
| LMZG      | 1     | 3.917         | 6.42              | 28.7             |
|           | 30    | 4.04          | 6.117             | 23.69            |
|           | 50    | 2.985         | 3.829             | 16.19            |
| Bare Li   | 1     | 3.653         | 63.75             | 39.13            |
|           | 30    | 4.408         | 10.56             | 40.26            |
|           | 50    | 3.977         | 4.202             | 18.15            |
